# Supplementary material for: A colloidal gold immunoassay strip assay for cadmium detection in oilfield chemicals
Source: Royal Society of Chemistry journal article supplement (doi:10.1039/d3an01075a), 2023-01-01
Supplement: d3an01075a1.pdf [file d3an01075a1.pdf]

### *Supporting information*

**Figure S1.** The characterization of antibody. (a) The standard curve of antibody. (b) The isotype of antibody.

**Figure S2.** The standard curve for detection of Cd<sup>2+</sup> in oilfield chemicals by ICP-MS.

**Table S1.** Cross-reactivity of mAb with Cd<sup>2+</sup> and other heavy metal ions.

**Table S2.** The absorbance value of the gold-labeled antibody solution at the maximum ultraviolet absorption peak.

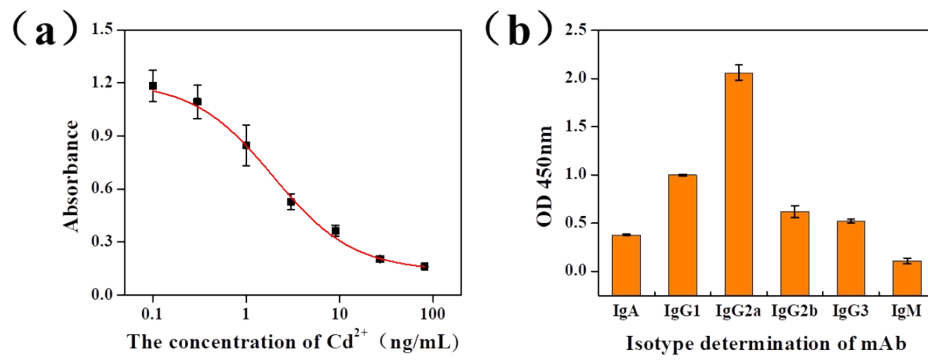

**Figure S1** The characterization of antibody. (a) The standard curve of antibody. (b) The isotype of antibody.

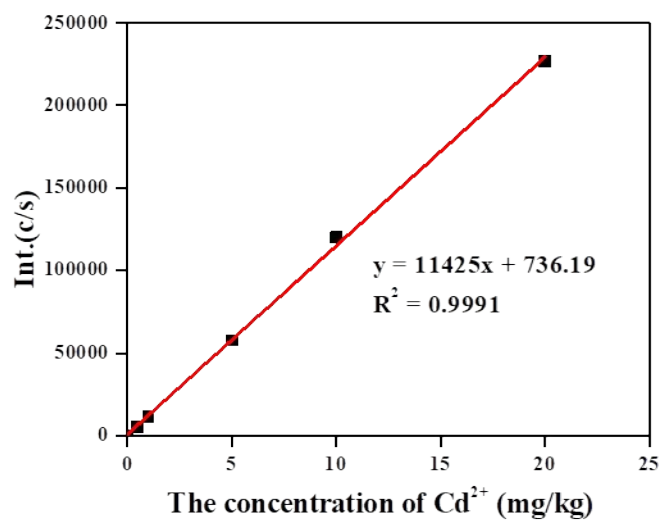

**Figure S2.** The standard curve for detection of Cd<sup>2+</sup> in oilfield chemicals by ICP-MS.

**Table S1.** Cross-reactivity of mAb with Cd<sup>2+</sup> and other heavy metal ions.

| Metal ion        | IC50 (ng/mL) | CR (%) |
|------------------|--------------|--------|
| Cd <sup>2+</sup> | 1.97         | 100    |
| Pb <sup>2+</sup> | >1000        | <0.2   |
| Hg <sup>2+</sup> | >1000        | <0.2   |
| Cu <sup>2+</sup> | >1000        | <0.2   |
| Co <sup>2+</sup> | >1000        | <0.2   |
| Zn <sup>2+</sup> | >1000        | <0.2   |
| Mg <sup>2+</sup> | >1000        | <0.2   |
| Fe <sup>2+</sup> | >1000        | <0.2   |
| Cr <sup>3+</sup> | >1000        | <0.2   |
| Al <sup>3+</sup> | >1000        | <0.2   |
| Ca <sup>2+</sup> | >1000        | <0.2   |
| Mn <sup>2+</sup> | >1000        | <0.2   |

**Table S2.** The absorbance value of the gold-labeled antibody solution at the maximum ultraviolet absorption peak.

| Amount of<br>K <sub>2</sub> CO <sub>3</sub> (μL) | Absorbance |               |            |               |
|--------------------------------------------------|------------|---------------|------------|---------------|
|                                                  | 15 nm - BB | 15 nm - HEPES | 35 nm - BB | 35 nm - HEPES |
| 4                                                | 0.5        | 0.59          | 0.48       | 0.03          |
| 8                                                | 0.57       | 0.64          | 0.52       | 0.04          |
| 12                                               | 0.58       | 0.59          | 0.59       | 0.17          |
| 16                                               | 0.59       | 0.62          | 0.61       | 0.27          |
| 20                                               | 0.59       | 0.59          | 0.53       | 0.40          |
| 24                                               | 0.58       | 0.63          | 0.63       | 0.42          |
